# Supplementary material for: Silicon induces hormetic dose-response effects on growth and concentrations of chlorophylls, amino acids and sugars in pepper plants during the early developmental stage
Source: PeerJ. 2020 Jun 9;8:e9224. doi: 10.7717/peerj.9224 (PMC7292026; doi:10.7717/peerj.9224)
Supplement: Supplemental Information 2 [file peerj-08-9224-s002.xlsx]

## Sheet: Silicon
Silicon induces hormetic dose–response effects on growth and concentrations of chlorophylls, amino acids and sugars in pepper plants during the early developmental stage
Treatment	Tissue	Rep	Chl a (µg g-1)	Chl b (µg g-1)	Total Chl (µg g-1)	Chl a/b ratio
Si 60	Leaves	R1	1600.86	260.24	1861.1	6.15148
		R2	1599.84	286.21	1886.05	5.58974
		R3	1616.22	277.09	1893.31	5.83283
		R4	1627.26	313.28	1940.54	5.19427
Si 60	Stems	R1	310.1	92.5	402.6	3.35243
		R2	326.7	105.76	432.46	3.08907
		R3	313.3	119.02	432.32	2.63233
		R4	323.04	83.09	406.13	3.88783
Si125	Leaves	R1	1628.28	287.31	1915.59	5.66733
		R2	1711.32	258.01	1969.33	6.63277
		R3	1714.62	264.64	1979.26	6.47907
		R4	1710.42	326.25	2036.67	5.24267
Si125	Stems	R1	391.9	136.79	528.69	2.86498
		R2	435.72	146.9	582.62	2.9661
		R3	448.92	143.42	592.34	3.13011
		R4	440.06	149.72	589.78	2.93922
Si250	Leaves	R1	1439.76	156.72	1596.48	9.18683
		R2	1467.18	173.79	1640.97	8.44226
		R3	1498.92	181.52	1680.44	8.2576
		R4	1507.68	175.11	1682.79	8.6099
Si250	Stems	R1	367.68	76.24	443.92	4.82267
		R2	376.44	79.83	456.27	4.71552
		R3	372.12	89.17	461.29	4.17315
		R4	371.1	95.14	466.24	3.90057
Control	Leaves	R1	1463.1	277.67	1740.77	5.2692
		R2	1525.44	276.83	1802.27	5.51039
		R3	1528.74	283.46	1812.2	5.39314
		R4	1537.62	329.32	1866.94	4.66908
Control	Stems	R1	340.6	103.82	444.42	3.28068
		R2	338.44	113.49	451.93	2.98211
		R3	345.96	120.67	466.63	2.86699
		R4	370.78	112.65	483.43	3.29143
