# Supplementary material for: Silicon induces hormetic dose-response effects on growth and concentrations of chlorophylls, amino acids and sugars in pepper plants during the early developmental stage
Source: PeerJ. 2020 Jun 9;8:e9224. doi: 10.7717/peerj.9224 (PMC7292026; doi:10.7717/peerj.9224)
Supplement: Supplemental Information 3 [file peerj-08-9224-s003.xlsx]

## Sheet: Silicon
Silicon induces hormetic dose–response effects on growth and concentrations of chlorophylls, amino acids and sugars in pepper plants during the early developmental stage
			Amino Acids (nM g-1 fresh biomass)
Treatment	Tissue	Rep
Si 60	Leaves	R1	2.9905
		R2	3.1055
		R3	3.2405
		R4	3.3205
Si 60	Stems	R1	2.1155
		R2	3.0855
		R3	2.1355
		R4	3.1205
Si 60	Roots	R1	4.5255
		R2	5.0255
		R3	5.3305
		R4	6.0555
Si125	Leaves	R1	1.9005
		R2	2.1155
		R3	2.1855
		R4	2.1605
Si125	Stems	R1	2.4105
		R2	2.4555
		R3	2.5805
		R4	2.6505
Si125	Roots	R1	4.5255
		R2	4.0855
		R3	4.55
		R4	4.1255
Si250	Leaves	R1	0.4155
		R2	0.4705
		R3	0.4555
		R4	0.4305
Si250	Stems	R1	1.0955
		R2	1.3905
		R3	1.3455
		R4	1.2655
Si250	Roots	R1	4.4305
		R2	4.6555
		R3	5.0305
		R4	5.1555
Control	Leaves	R1	2.023
		R2	1.9305
		R3	2.5255
		R4	2.3605
Control	Stems	R1	2.8355
		R2	2.7805
		R3	2.3055
		R4	2.2205
Control	Roots	R1	1.1605
		R2	1.0755
		R3	1.4005
		R4	1.5105
